# Supplementary material for: Atmospheric emissions of toxic elements (As, Cd, Hg, and Pb) from brick making plants in China
Source: Royal Society of Chemistry journal article supplement (doi:10.1039/c4ra14443k), 2015-01-01
Supplement: c4ra14443k1.pdf [file c4ra14443k1.pdf]

## SUPPORTING INFORMATION (SI)

**Submitted to:** RSC Advances

**Title:** Atmospheric Emissions of Toxic Elements (As, Cd, Hg, and Pb) from Brick Making Plants in China

**Authors:** Chuncao Zhou, Guijian Liu, Ting Fang, Paul K.S. Lam, James C.W. Lam

**Number of pages:** 25

**Number of tables:** 16

**Number of figures:** 1

**Number of references:** 65

**Table S1** Provincial coal consumption for brick making plants in China ( $10^4$  t).

**Table S2** Provincial production of bricks in China ( $10^9$  piece).

**Table S3** Provincial coal ash consumption in brick plants in China ( $10^4$  t).

**Table S4** Provincial coal gangue consumption in brick plants in China ( $10^4$  t).

**Table S5** Provincial clay consumption in brick plants in China ( $10^4$  t).

**Table S6** Provincial distribution of average concentration of toxic elements in coals.

**Table S7** The emission factors of toxic elements during coal combustion (%).

**Table S8** Provincial distribution of average concentration of toxic element in coal ash ( $\mu\text{g/g}$ ).

**Table S9** Provincial concentration of As in coal gangue ( $\mu\text{g/g}$ ).

**Table S10** Provincial concentration of Cd in coal gangue ( $\mu\text{g/g}$ ).

**Table S11** Provincial concentration of Pb in coal gangue ( $\mu\text{g/g}$ ).

**Table S12** Provincial concentration of Hg in coal gangue ( $\mu\text{g/g}$ ).

**Table S13** The concentration of toxic element in the selected coal, coal gangue, coal ash, clay samples and their combustion products.

**Table S14** The mass balances and distribution characterization of toxic element.

**Table S15** The concentration of toxic element in flue gas at the inlet/outlet of wet flue gas desulfurization systems and removal efficiency.

**Table S16** Uncertainties in the emissions of As, Cd, Hg, and Pb by different raw materials in China in 2013 (t) at a 95% confidence interval around the central estimate.

**Figure S1.** Trend of raw materials consumption in China, 2008-2013.

Table S1

Provincial coal consumption for brick making plants in China (10<sup>4</sup>t).

|                | 2008   | 2009    | 2010    | 2011    | 2012    | 2013    |
|----------------|--------|---------|---------|---------|---------|---------|
| Anhui          | 19.39  | 37.96   | 80.34   | 71.51   | 74.46   | 95.36   |
| Beijing        | 5.01   | 6.49    | 4.63    | 1.46    | 0.54    | 0.18    |
| Chongqing      | 12.98  | 28.70   | 40.39   | 20.73   | 24.35   | 31.05   |
| Fujian         | 5.54   | 8.90    | 15.17   | 9.12    | 17.35   | 30.54   |
| Gansu          | 0.77   | 20.24   | 0.94    | 0.28    | 5.47    | 4.82    |
| Guangdong      | 13.79  | 18.53   | 19.59   | 16.83   | 19.41   | 30.26   |
| Guangxi        | 24.39  | 41.02   | 61.68   | 58.07   | 58.64   | 66.04   |
| Guizhou        | 5.98   | 8.04    | 10.50   | 11.59   | 23.84   | 35.48   |
| Hebei          | 68.42  | 78.00   | 79.97   | 76.59   | 37.17   | 35.07   |
| Heilongjiang   | 2.76   | 6.06    | 17.82   | 30.43   | 39.17   | 31.55   |
| Henan          | 269.74 | 433.51  | 500.22  | 549.15  | 466.70  | 683.33  |
| Hubei          | 52.50  | 101.04  | 135.72  | 117.16  | 178.81  | 226.64  |
| Hunan          | 51.25  | 68.83   | 68.98   | 89.26   | 109.59  | 124.92  |
| Inner Mongolia | 10.21  | 12.47   | 15.06   | 18.77   | 17.77   | 21.22   |
| Jiangsu        | 18.87  | 19.64   | 22.48   | 11.35   | 10.70   | 10.22   |
| Jiangxi        | 12.69  | 18.01   | 21.41   | 16.00   | 13.57   | 12.93   |
| Jilin          | 13.77  | 40.75   | 41.33   | 36.52   | 37.88   | 38.70   |
| Liaoning       | 37.25  | 79.05   | 55.91   | 54.37   | 53.90   | 51.99   |
| Ningxia        | 0.00   | 0.34    | 0.79    | 1.41    | 1.07    | 0.90    |
| Qinghai        | 0.96   | 0.88    | 1.03    | 0.50    | 0.63    | 0.53    |
| Shanghai       | 0.09   | 0.00    | 0.17    | 0.00    | 0.55    | 1.12    |
| Shaanxi        | 2.90   | 14.23   | 25.12   | 30.25   | 39.28   | 63.32   |
| Shandong       | 93.54  | 158.34  | 170.13  | 160.53  | 157.03  | 154.36  |
| Shanxi         | 6.80   | 10.33   | 9.43    | 5.18    | 11.14   | 11.73   |
| Sichuan        | 37.90  | 90.68   | 106.86  | 161.44  | 131.78  | 147.19  |
| Tianjin        | 6.21   | 6.59    | 16.25   | 5.90    | 3.94    | 4.07    |
| Xinjiang       | 4.46   | 5.34    | 5.75    | 1.24    | 1.73    | 3.54    |
| Yunnan         | 1.66   | 1.70    | 2.44    | 2.35    | 6.55    | 6.48    |
| Zhejiang       | 20.58  | 27.41   | 22.64   | 7.67    | 6.81    | 7.94    |
| Total          | 800.72 | 1343.95 | 1553.53 | 1565.64 | 1549.83 | 1931.49 |

Notes: For the little brick output and no available data from references, the coal consumption in Hainan, Hong Kong, Macao, Taiwan and Xizang are not included in this table.

Table S2  
 Provincial production of bricks in China (10<sup>9</sup> piece).

|                | 2008    | 2009    | 2010    | 2011    | 2012    | 2013    |
|----------------|---------|---------|---------|---------|---------|---------|
| Anhui          | 35.25   | 69.03   | 160.68  | 143.01  | 165.47  | 211.92  |
| Beijing        | 9.11    | 11.80   | 9.27    | 2.92    | 1.21    | 0.41    |
| Chongqing      | 23.59   | 52.17   | 80.78   | 41.46   | 54.12   | 69.00   |
| Fujian         | 10.06   | 16.18   | 30.34   | 18.24   | 38.55   | 67.86   |
| Gansu          | 1.41    | 36.80   | 1.87    | 0.56    | 12.16   | 10.72   |
| Guangdong      | 25.07   | 33.69   | 39.19   | 33.66   | 43.12   | 67.24   |
| Guangxi        | 44.35   | 74.59   | 123.36  | 116.14  | 130.32  | 146.75  |
| Guizhou        | 10.88   | 14.61   | 21.01   | 23.17   | 52.99   | 78.85   |
| Hebei          | 124.41  | 141.81  | 159.94  | 153.18  | 82.61   | 77.93   |
| Heilongjiang   | 5.03    | 11.02   | 35.64   | 60.86   | 87.05   | 70.10   |
| Henan          | 490.43  | 788.21  | 1000.43 | 1098.31 | 1037.10 | 1518.51 |
| Hubei          | 95.45   | 183.71  | 271.44  | 234.32  | 397.36  | 503.65  |
| Hunan          | 93.18   | 125.14  | 137.96  | 178.52  | 243.54  | 277.60  |
| Inner Mongolia | 18.56   | 22.68   | 30.13   | 37.54   | 39.48   | 47.15   |
| Jiangsu        | 34.31   | 35.71   | 44.96   | 22.69   | 23.77   | 22.71   |
| Jiangxi        | 23.06   | 32.75   | 42.82   | 32.01   | 30.16   | 28.73   |
| Jilin          | 25.03   | 74.09   | 82.66   | 73.03   | 84.18   | 86.01   |
| Liaoning       | 67.72   | 143.73  | 111.82  | 108.74  | 119.79  | 115.53  |
| Ningxia        | 0.00    | 0.61    | 1.58    | 2.82    | 2.37    | 2.01    |
| Qinghai        | 1.75    | 1.60    | 2.05    | 1.01    | 1.39    | 1.17    |
| Shaanxi        | 5.27    | 25.88   | 50.25   | 60.50   | 87.28   | 140.70  |
| Shandong       | 170.08  | 287.90  | 340.26  | 321.05  | 348.96  | 343.02  |
| Shanghai       | 0.17    | 0.00    | 0.35    | 0.00    | 1.23    | 2.49    |
| Shanxi         | 12.37   | 18.78   | 18.87   | 10.35   | 24.76   | 26.07   |
| Sichuan        | 68.91   | 164.88  | 213.72  | 322.88  | 292.83  | 327.09  |
| Tianjin        | 11.29   | 11.98   | 32.50   | 11.80   | 8.76    | 9.04    |
| Xinjiang       | 8.10    | 9.71    | 11.50   | 2.47    | 3.85    | 7.86    |
| Yunnan         | 3.02    | 3.09    | 4.87    | 4.70    | 14.55   | 14.40   |
| Zhejiang       | 37.42   | 49.84   | 45.28   | 15.34   | 15.12   | 17.65   |
| Total          | 1455.85 | 2443.55 | 3107.06 | 3131.28 | 3444.06 | 4292.19 |

Notes: For the little brick output and no available data from references, the production of bricks in Hainan, Hong Kong, Macao, Taiwan and Xizang are not included in this table.

Table S3

Provincial coal ash consumption in brick plants in China (10<sup>4</sup> t).

|                | 2008           | 2009           | 2010           | 2011           | 2012           | 2013           |
|----------------|----------------|----------------|----------------|----------------|----------------|----------------|
| Anhui          | 37.95          | 76.21          | 181.82         | 165.78         | 196.38         | 257.36         |
| Beijing        | 9.80           | 13.03          | 10.49          | 3.38           | 1.44           | 0.50           |
| Chongqing      | 25.40          | 57.60          | 61.54          | 48.06          | 64.22          | 83.79          |
| Fujian         | 10.83          | 17.87          | 24.24          | 21.14          | 45.75          | 82.41          |
| Gansu          | 1.52           | 40.63          | 2.12           | 0.64           | 14.43          | 13.02          |
| Guangdong      | 26.99          | 37.20          | 37.30          | 39.01          | 51.18          | 81.66          |
| Guangxi        | 47.74          | 82.35          | 109.60         | 134.63         | 154.66         | 178.21         |
| Guizhou        | 11.71          | 16.13          | 23.77          | 26.86          | 62.88          | 95.75          |
| Hebei          | 133.91         | 156.54         | 180.98         | 177.56         | 198.04         | 194.96         |
| Heilongjiang   | 5.41           | 12.17          | 40.33          | 70.54          | 103.31         | 85.13          |
| Henan          | 527.90         | 870.18         | 1132.09        | 1273.16        | 1230.84        | 1844.07        |
| Hubei          | 102.74         | 202.81         | 222.81         | 271.62         | 471.58         | 611.63         |
| Hunan          | 100.29         | 138.16         | 156.12         | 206.94         | 289.03         | 337.12         |
| Inner Mongolia | 19.98          | 25.03          | 34.09          | 43.52          | 46.85          | 57.26          |
| Jiangsu        | 36.94          | 39.42          | 40.88          | 66.32          | 68.21          | 67.58          |
| Jiangxi        | 24.83          | 36.15          | 38.46          | 37.10          | 35.79          | 34.89          |
| Jilin          | 26.94          | 81.80          | 93.54          | 84.66          | 99.90          | 104.45         |
| Liaoning       | 72.90          | 85.87          | 126.53         | 126.06         | 142.16         | 140.30         |
| Ningxia        | 0.00           | 0.68           | 1.79           | 3.27           | 2.81           | 2.44           |
| Qinghai        | 1.89           | 1.76           | 1.33           | 1.17           | 1.65           | 1.42           |
| Shanghai       | 0.18           | 0.19           | 0.39           | 0.85           | 1.46           | 3.03           |
| Shaanxi        | 5.67           | 28.57          | 56.86          | 70.13          | 103.59         | 170.87         |
| Shandong       | 183.07         | 317.84         | 385.04         | 372.17         | 414.14         | 416.56         |
| Shanxi         | 13.31          | 20.73          | 21.35          | 12.00          | 29.38          | 31.66          |
| Sichuan        | 74.18          | 182.02         | 241.85         | 374.28         | 347.54         | 397.22         |
| Tianjin        | 12.15          | 13.22          | 13.45          | 13.67          | 10.39          | 10.98          |
| Xinjiang       | 8.72           | 10.72          | 8.01           | 8.87           | 9.57           | 9.55           |
| Yunnan         | 3.25           | 3.41           | 5.51           | 5.44           | 17.27          | 17.49          |
| Zhejiang       | 20.27          | 25.03          | 21.34          | 27.78          | 27.95          | 21.44          |
| <b>Total</b>   | <b>1546.45</b> | <b>2593.32</b> | <b>3273.62</b> | <b>3686.62</b> | <b>4242.41</b> | <b>5352.75</b> |

Notes: For the little brick output and no available data from references, the coal fly ash consumption in Hainan, Hong Kong, Macao, Taiwan and Xizang are not included in this table.

Table S4

Provincial coal gangue consumption in brick plants in China (10<sup>4</sup> t).

|                | 2008   | 2009   | 2010    | 2011    | 2012    | 2013    |
|----------------|--------|--------|---------|---------|---------|---------|
| Anhui          | 13.75  | 27.61  | 55.88   | 60.07   | 71.15   | 93.24   |
| Beijing        | 3.55   | 4.72   | 3.80    | 1.23    | 0.52    | 0.18    |
| Chongqing      | 9.20   | 20.87  | 23.22   | 17.41   | 23.27   | 30.36   |
| Fujian         | 3.93   | 6.47   | 6.44    | 7.66    | 16.57   | 29.86   |
| Gansu          | 0.55   | 0.72   | 0.77    | 3.23    | 5.23    | 4.72    |
| Guangxi        | 17.30  | 29.84  | 50.58   | 48.78   | 56.04   | 64.57   |
| Guizhou        | 4.24   | 5.84   | 8.61    | 9.73    | 22.78   | 34.69   |
| Hebei          | 28.52  | 26.72  | 35.57   | 34.33   | 35.52   | 34.29   |
| Heilongjiang   | 1.96   | 4.41   | 14.61   | 25.56   | 37.43   | 30.84   |
| Henan          | 191.27 | 315.28 | 410.18  | 461.29  | 445.96  | 668.14  |
| Hubei          | 37.23  | 73.48  | 81.29   | 98.41   | 170.86  | 221.61  |
| Hunan          | 36.34  | 50.06  | 56.56   | 74.98   | 104.72  | 122.14  |
| Inner Mongolia | 7.24   | 9.07   | 12.35   | 15.77   | 16.98   | 20.75   |
| Jiangsu        | 3.38   | 4.28   | 8.43    | 9.53    | 10.22   | 9.99    |
| Jiangxi        | 9.00   | 13.10  | 13.56   | 13.44   | 12.97   | 12.64   |
| Jilin          | 9.76   | 29.64  | 30.89   | 30.67   | 36.20   | 37.84   |
| Liaoning       | 26.41  | 57.49  | 45.85   | 45.67   | 51.51   | 50.83   |
| Ningxia        | 0.00   | 0.25   | 0.65    | 1.18    | 1.02    | 0.88    |
| Qinghai        | 0.68   | 0.64   | 0.84    | 0.42    | 0.60    | 0.51    |
| Shaanxi        | 2.05   | 10.35  | 20.60   | 25.41   | 37.53   | 61.91   |
| Shandong       | 66.33  | 115.16 | 130.51  | 134.84  | 150.05  | 150.93  |
| Shanxi         | 4.82   | 7.51   | 7.74    | 8.35    | 10.65   | 11.47   |
| Sichuan        | 26.88  | 65.95  | 87.63   | 135.61  | 125.92  | 143.92  |
| Xinjiang       | 1.16   | 1.18   | 1.71    | 1.04    | 1.66    | 3.46    |
| Yunnan         | 1.18   | 1.24   | 2.00    | 1.97    | 6.26    | 6.34    |
| Zhejiang       | 4.59   | 4.94   | 4.56    | 6.44    | 6.50    | 7.77    |
| Total          | 497.56 | 859.21 | 1058.94 | 1212.97 | 1386.96 | 1760.66 |

Notes: For the little brick output, little coal output and no available data from references, the coal gangue consumption in Guangdong, Shanghai, Tianjin, Hainan, Hong Kong, Macao, Taiwan and Xizang are not included in this table.

Table S5  
 Provincial clay consumption in brick plants in China (10<sup>4</sup> t).

|                | 2008   | 2009    | 2010    | 2011    | 2012    | 2013    |
|----------------|--------|---------|---------|---------|---------|---------|
| Anhui          | 17.06  | 30.37   | 63.63   | 50.34   | 50.96   | 50.90   |
| Beijing        | 4.41   | 5.19    | 3.67    | 1.03    | 0.37    | 0.11    |
| Chongqing      | 11.42  | 22.95   | 31.99   | 14.59   | 16.67   | 18.22   |
| Fujian         | 4.87   | 7.12    | 12.01   | 6.42    | 11.87   | 17.92   |
| Gansu          | 0.68   | 16.19   | 0.74    | 0.20    | 3.75    | 2.83    |
| Guangdong      | 12.13  | 14.82   | 15.52   | 11.85   | 13.28   | 17.75   |
| Guangxi        | 21.47  | 32.82   | 48.85   | 40.88   | 40.14   | 38.74   |
| Guizhou        | 5.27   | 6.43    | 8.32    | 8.16    | 16.32   | 20.82   |
| Hebei          | 60.21  | 62.40   | 63.34   | 53.92   | 25.44   | 20.57   |
| Heilongjiang   | 2.43   | 4.85    | 14.11   | 21.42   | 26.81   | 18.51   |
| Henan          | 237.37 | 346.81  | 396.17  | 386.61  | 319.43  | 400.89  |
| Hubei          | 46.20  | 80.83   | 87.54   | 82.48   | 82.38   | 84.96   |
| Hunan          | 45.10  | 55.06   | 54.63   | 62.84   | 75.01   | 73.29   |
| Inner Mongolia | 8.98   | 9.98    | 11.93   | 13.21   | 12.16   | 12.45   |
| Jiangsu        | 16.61  | 15.71   | 17.80   | 7.99    | 7.32    | 6.00    |
| Jiangxi        | 11.16  | 14.41   | 16.96   | 11.27   | 9.29    | 7.58    |
| Jilin          | 12.11  | 32.60   | 32.73   | 25.71   | 25.93   | 22.71   |
| Liaoning       | 32.78  | 63.24   | 44.28   | 38.28   | 36.90   | 30.50   |
| Ningxia        | 0.00   | 0.27    | 0.63    | 0.99    | 0.73    | 0.53    |
| Qinghai        | 0.85   | 0.70    | 0.81    | 0.36    | 0.43    | 0.31    |
| Shaanxi        | 2.55   | 11.39   | 19.90   | 21.30   | 23.89   | 27.14   |
| Shandong       | 82.32  | 126.68  | 134.74  | 113.01  | 107.48  | 90.56   |
| Shanghai       | 0.08   | 0.00    | 0.14    | 0.00    | 0.38    | 0.35    |
| Shanxi         | 5.99   | 8.26    | 7.47    | 3.64    | 3.62    | 3.88    |
| Sichuan        | 33.35  | 72.55   | 84.63   | 86.65   | 90.19   | 86.35   |
| Tianjin        | 5.46   | 5.27    | 12.87   | 4.15    | 2.70    | 2.39    |
| Xinjiang       | 3.92   | 4.27    | 4.55    | 0.87    | 1.19    | 2.08    |
| Yunnan         | 1.46   | 1.36    | 1.93    | 1.65    | 4.48    | 3.80    |
| Zhejiang       | 18.11  | 21.93   | 17.93   | 5.40    | 4.66    | 4.66    |
| Total          | 704.36 | 1074.48 | 1209.84 | 1075.21 | 1013.77 | 1066.77 |

Table S6

Provincial distribution of average concentration of toxic elements in coals.

|                | Ash yield (wt. %) | As ( $\mu\text{g/g}$ ) | Cd ( $\mu\text{g/g}$ ) | Hg ( $\mu\text{g/g}$ ) | Pb ( $\mu\text{g/g}$ ) |
|----------------|-------------------|------------------------|------------------------|------------------------|------------------------|
| Anhui          | 16.8              | 2.89                   | 0.11                   | 0.43                   | 13.2                   |
| Beijing        | 10.1              | 4.02                   | 0.66                   | 0.17                   | 26.7                   |
| Chongqing      | 25.5              | 5.66                   | 1.22                   | 0.31                   | 30.4                   |
| Fujian         | 8.85              | 9.93                   | 0.31                   | 0.07                   | 25.5                   |
| Gansu          | 7.43              | 4.14                   | 0.08                   | 0.27                   | 8.35                   |
| Guangdong      | 8.60              | 8.30                   | 0.25                   | 0.07                   | 24.4                   |
| Guangxi        | 8.81              | 16.9                   | 0.41                   | 0.33                   | 29.9                   |
| Guizhou        | 8.63              | 6.68                   | 0.79                   | 0.39                   | 23.8                   |
| Hebei          | 12.4              | 4.88                   | 0.23                   | 0.15                   | 29.3                   |
| Heilongjiang   | 13.5              | 3.42                   | 0.13                   | 0.12                   | 22.2                   |
| Henan          | 14.5              | 2.20                   | 0.54                   | 0.20                   | 16.8                   |
| Hubei          | 7.91              | 5.30                   | 0.36                   | 0.20                   | 47.4                   |
| Hunan          | 8.40              | 10.6                   | 0.64                   | 0.12                   | 26.3                   |
| Inner Mongolia | 6.36              | 5.77                   | 0.10                   | 0.22                   | 26.7                   |
| Jiangsu        | 11.4              | 2.74                   | 0.06                   | 0.69                   | 20.9                   |
| Jiangxi        | 7.55              | 7.41                   | 0.56                   | 0.16                   | 19.3                   |
| Jilin          | 8.92              | 11.6                   | 0.15                   | 0.40                   | 29.0                   |
| Liaoning       | 12.4              | 5.51                   | 0.16                   | 0.17                   | 19.6                   |
| Ningxia        | 6.76              | 3.65                   | 1.10                   | 0.22                   | 14.1                   |
| Qinghai        | 18.4              | 2.68                   | 0.03                   | 0.25                   | 10.7                   |
| Shaanxi        | 7.62              | 3.87                   | 0.75                   | 0.21                   | 35.2                   |
| Shandong       | 8.88              | 5.23                   | 0.39                   | 0.18                   | 16.6                   |
| Shanghai       | 7.43              | 4.92                   | 0.20                   | 0.28                   | 24.0                   |
| Shanxi         | 13.5              | 3.84                   | 0.75                   | 0.17                   | 26.2                   |
| Sichuan        | 6.57              | 5.38                   | 1.95                   | 0.29                   | 28.3                   |
| Tianjin        | 8.37              | 3.98                   | 1.74                   | 0.17                   | 29.6                   |
| Xinjiang       | 11.5              | 2.97                   | 0.12                   | 0.06                   | 2.68                   |
| Yunnan         | 6.91              | 8.82                   | 0.80                   | 0.36                   | 42.5                   |
| Zhejiang       | 11.7              | 12.0                   | 0.47                   | 0.65                   | 17.3                   |

Table S7

The emission factors of toxic elements during coal combustion (%).

| Element                                          | Emission factor, controlling devices, and sources        |
|--------------------------------------------------|----------------------------------------------------------|
| As                                               | 0.78-1.1 / ESP (Ondov et al., 1979)                      |
|                                                  | 12.5 / ESP (Brooks, 1989)                                |
|                                                  | 0.1-2.8 /ESP (Szpunar, 1993)                             |
|                                                  | 2.8 / ESP (Wang et al., 1995)                            |
|                                                  | 3.9 / ESP (Heble, 2000)                                  |
|                                                  | 0.7-1.9 / ESP (Otero-Rey et al., 2003)                   |
|                                                  | 1.5-2.1 / ESP (Reddy et al., 2005)                       |
|                                                  | 0.85 / ESP (Goodarzi, 2006)                              |
|                                                  | 1.7 / ESP, 0.41 / ESP+FGD (Meij and Te Winkel, 2007)     |
|                                                  | 1.6/ ESP + FGD (Ito et al., 2006)                        |
|                                                  | 13. 8 / ESP (Tian et al., 2013)                          |
|                                                  |                                                          |
| Cd                                               | 6.3-11.5 / ESP (Ondov et al., 1979)                      |
|                                                  | 25.4 / ESP (Brooks, 1989)                                |
|                                                  | 2.7 / ESP (Szpunar, 1993)                                |
|                                                  | 12.3-18.6 (Reddy et al., 2005)                           |
|                                                  | 1.42 / ESP (Goodarzi, 2006)                              |
|                                                  | 1.4 / ESP+FGD (Ito et al., 2006)                         |
|                                                  | 1.5 / ESP, 0.29 / ESP+ FGD (Meij and Te Winkel, 2007)    |
|                                                  | 3.53 (Tian et al., 2013)                                 |
|                                                  |                                                          |
| Hg                                               | 53.4-93.5 (Wang et al.,2000)                             |
|                                                  | 68.3 / ESP (Zhu et al., 2002)                            |
|                                                  | 71.2-80.3 / ESP (Otero-Rey et al., 2003)                 |
|                                                  | 61-73 / ESP (Pavlish et al., 2003)                       |
|                                                  | 72.6- 80.1 / ESP (Reddy et al., 2005)                    |
|                                                  | 69.4 / ESP (Streets et al., 2005)                        |
|                                                  | 56.5 /ESP (Goodarzi, 2006)                               |
|                                                  | 83 / ESP (Guo et al., 2007)                              |
|                                                  | 88.5 / ESP (Zhang et al., 2008)                          |
|                                                  | 29.1 / ESP+FGD (Yokoyama et al., 2000)                   |
|                                                  | 26.0 / ESP+FGD (USEPA, 2002)                             |
|                                                  | 24.6 / ESP+FGD (Lee et al., 2006)                        |
|                                                  | 27.6 / ESP+FGD (Ito et al., 2006)                        |
|                                                  | 50.4 / ESP, 25.1 / ESP+FGD (Meij and Te Winkel, 2007)    |
|                                                  | 53.6-93.9 / ESP, 18.6-32.2 / ESP+FGD (Wang et al., 2010) |
| 66.8 / ESP, 9.61 / ESP + FGD (Tian et al., 2013) |                                                          |
|                                                  |                                                          |
| Pb                                               | 3.7-5.5 / ESP (Ondov, 1979)                              |
|                                                  | 1.8 / ESP (Szpunar, 1993)                                |



Continued

---

|    |                                                       |
|----|-------------------------------------------------------|
| Pb | 0.4-0.5 /ESP (Reddy et al., 2005)                     |
|    | 0.38 / ESP (Goodarzi, 2006)                           |
|    | 1.2 / ESP +FGD (Ito et al., 2006)                     |
|    | 0.90 / ESP, 0.18 / ESP+FGD (Meij and Te Winkel, 2007) |
|    | 2.83 / ESP (Tian et al., 2013)                        |

---

Table S8

Provincial distribution of average concentration of toxic element in coal ash ( $\mu\text{g/g}$ ).

|                | As   | Cd   | Hg   | Pb   |
|----------------|------|------|------|------|
| Anhui          | 16.7 | 0.62 | 0.79 | 77.3 |
| Beijing        | 38.6 | 6.22 | 0.52 | 259  |
| Chongqing      | 21.5 | 4.55 | 0.38 | 117  |
| Fujian         | 108  | 3.33 | 0.24 | 282  |
| Gansu          | 54.0 | 1.02 | 1.12 | 110  |
| Guangdong      | 93.5 | 2.76 | 0.25 | 278  |
| Guangxi        | 186  | 4.43 | 1.16 | 333  |
| Guizhou        | 75.0 | 8.71 | 1.40 | 271  |
| Hebei          | 38.1 | 1.76 | 0.37 | 232  |
| Heilongjiang   | 24.5 | 0.92 | 0.27 | 161  |
| Henan          | 14.7 | 3.54 | 0.43 | 113  |
| Hubei          | 64.9 | 4.33 | 0.78 | 587  |
| Hunan          | 122  | 7.25 | 0.44 | 306  |
| Inner Mongolia | 87.9 | 1.50 | 1.07 | 411  |
| Jiangsu        | 23.3 | 0.50 | 1.87 | 180  |
| Jiangxi        | 95.1 | 7.05 | 0.65 | 251  |
| Jilin          | 126  | 1.60 | 1.38 | 319  |
| Liaoning       | 43.0 | 1.23 | 0.42 | 156  |
| Ningxia        | 52.3 | 15.5 | 1.00 | 204  |
| Qinghai        | 14.1 | 0.16 | 0.42 | 57.1 |
| Shaanxi        | 49.2 | 9.36 | 0.85 | 453  |
| Shandong       | 57.1 | 4.18 | 0.63 | 184  |
| Shanghai       | 64.1 | 2.56 | 1.16 | 317  |
| Shanxi         | 27.6 | 5.28 | 0.39 | 191  |
| Sichuan        | 79.3 | 28.2 | 1.36 | 422  |
| Tianjin        | 46.1 | 19.8 | 0.63 | 347  |
| Xinjiang       | 25.0 | 0.99 | 0.16 | 22.8 |
| Yunnan         | 124  | 11.0 | 1.61 | 603  |
| Zhejiang       | 99.7 | 3.82 | 1.72 | 145  |

Table S9

Provincial concentration of As in coal gangue ( $\mu\text{g/g}$ ).

|                | Min  | Max  | Ave  | Amounts | References                                                                  |
|----------------|------|------|------|---------|-----------------------------------------------------------------------------|
| Anhui          | 2.47 | 38.6 | 18.8 | 330     | Cui et al., 2004; Cai et al., 2008; Chen et al., 2011; Zhou et al., 2014a,b |
| Beijing        |      |      | 1.62 | 3       | Ren et al., 2006                                                            |
| Chongqing      | 0.40 | 9.60 | 3.08 | 21      | Yang et al., 1983; Ren et al., 2006                                         |
| Fujian         | 7.50 | 21.0 | 12.0 | 3       | Lu et al., 1995; Cui and Chen, 1998; Ren et al., 2006                       |
| Gansu          | 3.49 | 9.58 | 3.47 | 2       | Yang et al., 1983; Ren et al., 2006                                         |
| Guangxi        |      |      | 3.84 | 1       | Yang et al., 1983; Ren et al., 2006                                         |
| Guizhou        | 2.89 | 3.15 | 3.02 | 2       | Zhang, 2009                                                                 |
| Hebei          | 0.50 | 7.20 | 2.38 | 9       | Yang et al., 1983; Dai, 2002; Ren et al., 2006                              |
| Heilongjiang   | 2.20 | 11.1 | 6.00 | 5       | Song, 2007                                                                  |
| Henan          | 2.08 | 12.3 | 6.45 | 22      | Cui et al., 2004; Jin et al., 2012                                          |
| Hubei          | 9.6  | 24.3 | 17.3 | 3       | Yang et al., 1983; Lu et al., 1995; Ren et al., 2006                        |
| Hunan          | 1.30 | 15.1 | 4.14 | 17      | Yuan, 1999; Ren et al., 2006                                                |
| Inner Mongolia | 9.81 | 17.2 | 13.5 | 5       | Ao, 2005; Sun et al., 2007                                                  |
| Jiangsu        | 0.40 | 8.00 | 2.04 | 12      | Chen and Tang, 2002; Ren et al., 2006                                       |
| Jiangxi        | 8.2  | 30.1 | 17.1 | 8       | Zhou, 1991; Ren et al., 2006                                                |
| Jilin          | 0.40 | 61.4 | 7.45 | 56      | Wu et al., 2004; Ren et al., 2006                                           |
| Liaoning       | 0.50 | 28.2 | 9.26 | 12      | Zhao, 2007                                                                  |
| Ningxia        | 0.25 | 9.05 | 0.97 | 11      | Dai, 2002; Song, 2003; Ren et al., 2006                                     |
| Qinghai        | 1.34 | 3.62 | 2.70 | 4       | Ren et al., 2006                                                            |
| Shaanxi        | 1.00 | 3.00 | 1.90 | 5       | Yang et al., 1983; Ren et al., 2006                                         |
| Shandong       | 0.45 | 8.14 | 5.34 | 35      | Liu et al., 2001; Xu et al., 2002; Yin et al., 2006; Wu et al., 2009        |
| Shanxi         | 0.78 | 27.5 | 3.62 | 60      | Ge, 1996; Zhang, 2012                                                       |
| Sichuan        | 1.54 | 31.8 | 10.7 | 6       | Zhang et al., 1992; Yuan, 1999; Ren et al., 2006                            |
| Xinjiang       | 0.92 | 4.28 | 1.85 | 10      | Chen and Tang, 2002; Ren et al., 2006                                       |
| Yunnan         | 0.10 | 86.2 | 6.20 | 96      | Zhou, 1998; Ren et al., 2006                                                |
| Zhejiang       | 4.21 | 17.5 | 13.0 | 8       | Yang et al., 1983; Li et al., 1993; Cui and Chen, 1998; Ren et al., 2006    |

Table S10

Provincial concentration of Cd in coal gangue ( $\mu\text{g/g}$ ).

|                | Min  | Max  | Ave  | Amounts | References                                                                  |
|----------------|------|------|------|---------|-----------------------------------------------------------------------------|
| Anhui          | 0.02 | 0.54 | 0.07 | 330     | Cui et al., 2004; Cai et al., 2008; Chen et al., 2011; Zhou et al., 2014a,b |
| Beijing        |      |      | 0.66 | 1       | Tian et al., 2014                                                           |
| Chongqing      | 0.16 | 5.40 | 2.21 | 5       | Ren et al., 2006                                                            |
| Fujian         | 0.03 | 0.61 | 0.19 | 5       | Lu, 1995; Yue et al., 2005                                                  |
| Gansu          |      |      | 0.08 | 1       | Ren et al., 2006                                                            |
| Guangxi        |      |      | 0.25 | 1       | Lu, 1995                                                                    |
| Guizhou        | 0.15 | 0.37 | 0.26 | 10      | Ding et al., 2011                                                           |
| Hebei          | 0.09 | 0.93 | 0.21 | 30      | Zhuang et al., 1999; Ren et al., 2006                                       |
| Heilongjiang   | 0.02 | 0.25 | 0.17 | 9       | Wang et al., 1996; Ren et al., 2006                                         |
| Henan          | 0.05 | 1.47 | 0.69 | 22      | Cui et al., 2004; Jin et al., 2012                                          |
| Hubei          | 0.08 | 0.63 | 0.38 | 2       | Lu, 1995; Ren et al., 2006                                                  |
| Hunan          | 0.7  | 1.20 | 0.95 | 10      | Wang, 1994; Ren et al., 2006                                                |
| Inner Mongolia | 2.84 | 5.82 | 3.52 | 5       | Ao, 2005; Sun et al., 2007                                                  |
| Jiangsu        | n.d. | 0.11 | 0.03 | 5       | Tang and Zhao, 2002; Ren et al., 2006                                       |
| Jiangxi        | 0.20 | 1.00 | 0.53 | 4       | Zhuang et al., 2001; Ren et al., 2006                                       |
| Jilin          | n.d. | 0.44 | 0.18 | 56      | Wu et al., 2004; Ren et al., 2006                                           |
| Liaoning       | n.d. | 0.80 | 0.17 | 14      | Zhao, 2007                                                                  |
| Ningxia        | 0.02 | 2.30 | 0.15 | 12      | Dai, 2002; Song, 2003; Ren et al., 2006                                     |
| Qinghai        | 0.01 | 0.04 | 0.03 | 4       | Ren et al., 2006                                                            |
| Shaanxi        |      |      | 0.75 | 1       | Tian et al., 2014                                                           |
| Shandong       | 0.42 | 1.06 | 0.76 | 21      | Liu et al., 2001; Xu et al., 2002; Yin et al., 2006; Wu et al., 2009        |
| Shanxi         | 0.11 | 1.70 | 0.23 | 60      | Ge, 1996; Zhang, 2012                                                       |
| Sichuan        | 0.79 | 3.10 | 2.13 | 5       | Ren et al., 2006                                                            |
| Xinjiang       | 0.04 | 0.32 | 0.12 | 5       | Ren et al., 2006                                                            |
| Yunnan         | 0.50 | 2.90 | 0.59 | 42      | Zhou, 1998; Ren et al., 2006                                                |
| Zhejiang       | 0.35 | 0.59 | 0.51 | 2       | Ren et al., 2006                                                            |

Table S11

Provincial concentration of Pb in coal gangue ( $\mu\text{g/g}$ ).

|                | Min  | Max  | Ave  | Amounts | References                                                                  |
|----------------|------|------|------|---------|-----------------------------------------------------------------------------|
| Anhui          | 1.09 | 32.2 | 28.7 | 330     | Cui et al., 2004; Cai et al., 2008; Chen et al., 2011; Zhou et al., 2014a,b |
| Beijing        |      |      | 17.2 | 1       | Ren et al., 2006                                                            |
| Chongqing      | 16.8 | 42.5 | 24.4 | 5       | Ren et al., 2006                                                            |
| Fujian         | 4.98 | 42.2 | 32.3 | 5       | Lu, 1995; Yue et al., 2005                                                  |
| Gansu          | 2.75 | 13.5 | 8.35 | 3       | Ren et al., 2006                                                            |
| Guangxi        | 18.1 | 59.0 | 47.1 | 5       | Lu, 1995; Ren et al., 2006                                                  |
| Guizhou        | 5.15 | 13.7 | 9.64 | 10      | Ding et al., 2011                                                           |
| Hebei          | 4.50 | 37.8 | 18.7 | 5       | Li, 2010; Ouyang et al., 2013                                               |
| Heilongjiang   | 12.3 | 28.4 | 23.5 | 9       | Song, 2007                                                                  |
| Henan          | 7.52 | 52.8 | 36.1 | 22      | Cui et al., 2004; Jin et al., 2012                                          |
| Hubei          | 22.7 | 53.8 | 38.3 | 2       | Lu, 1995; Ren et al., 2006                                                  |
| Hunan          | 26.5 | 43.9 | 35.2 | 2       | Ren et al., 2006                                                            |
| Inner Mongolia | 10.0 | 15.6 | 12.8 | 5       | Ao, 2005; Sun et al., 2007                                                  |
| Jiangsu        | 2.30 | 50.6 | 17.8 | 4       | Tang and Zhao, 2002; Ren et al., 2006                                       |
| Jiangxi        | 8.50 | 18.0 | 12.4 | 4       | Lu, 1995; Zhuang et al., 2001; Ren et al., 2006                             |
| Jilin          | 1.60 | 69.0 | 30.7 | 56      | Wu et al., 2004; Ren et al., 2006                                           |
| Liaoning       | 4.40 | 47.0 | 26.4 | 14      | Zhao, 2007                                                                  |
| Ningxia        | 3.80 | 16.2 | 8.54 | 7       | Dai, 2002; Song, 2003                                                       |
| Qinghai        | 6.20 | 22.6 | 10.7 | 4       | Ren et al., 2006                                                            |
| Shaanxi        | 16.2 | 28.7 | 24.5 | 11      | Ren et al., 2006                                                            |
| Shandong       | 27.1 | 256  | 38.6 | 35      | Liu et al., 2001; Xu et al., 2002; Yin et al., 2006; Wu et al., 2009        |
| Shanxi         | 0.50 | 108  | 25.3 | 60      | Ge, 1996; Zhang, 2012                                                       |
| Sichuan        | 6.50 | 49.7 | 29.7 | 4       | Zhang et al., 1992; Ren et al., 2006                                        |
| Xinjiang       | 1.20 | 9.90 | 5.28 | 4       | Ren et al., 2006                                                            |
| Yunnan         | 10.5 | 19.3 | 15.2 | 3       | Rong, 2003; Ren et al., 2006                                                |
| Zhejiang       | 11.6 | 22.9 | 17.1 | 2       | Ren et al., 2006                                                            |

Table S12

Provincial concentration of Hg in coal gangue ( $\mu\text{g/g}$ ).

|                | Min   | Max   | Ave   | Amounts | References                                                           |
|----------------|-------|-------|-------|---------|----------------------------------------------------------------------|
| Anhui          | 0.220 | 0.760 | 0.630 | 90      | Cui et al., 2004; Cai et al., 2008                                   |
| Beijing        |       |       | 0.100 | 1       | Ren et al., 2006                                                     |
| Chongqing      | 0.500 | 0.616 | 0.553 | 4       | Yao et al., 2004; Ren et al., 2006                                   |
| Fujian         |       |       | 0.070 |         | Tian et al., 2014                                                    |
| Gansu          |       |       | 1.350 | 1       | Ren et al., 2006                                                     |
| Guangxi        |       |       | 0.330 |         | Tian et al., 2014                                                    |
| Guizhou        | 0.076 | 0.377 | 0.137 | 29      | Song and He, 2009                                                    |
| Hebei          | 0.031 | 0.800 | 0.163 | 24      | Zhuang et al., 1999; Dai, 2002; Ren et al., 2006                     |
| Heilongjiang   | 0.012 | 0.069 | 0.035 | 5       | Song, 2007                                                           |
| Henan          | 0.100 | 0.130 | 0.120 | 2       | Jin et al., 2012                                                     |
| Hubei          |       |       | 0.230 | 1       | Ren et al., 2006                                                     |
| Hunan          | 0.046 | 0.197 | 0.071 | 10      | Wang 1994                                                            |
| Inner Mongolia | 0.004 | 0.771 | 0.326 | 4       | Sun et al., 2007                                                     |
| Jiangsu        | 0.022 | 0.300 | 0.177 | 9       | Huang and Yang, 2002; Ren et al., 2006                               |
| Jiangxi        |       |       | 0.200 | 1       | Ren et al., 2006                                                     |
| Jilin          |       |       | 0.430 | 1       | Wang and Ma, 1997                                                    |
| Liaoning       | n.d.  | 0.400 | 0.150 | 14      | Zhao, 2007                                                           |
| Ningxia        | 0.106 | 0.220 | 0.154 | 6       | Dai, 2002; Song, 2003                                                |
| Qinghai        | 0.200 | 0.570 | 0.308 | 4       | Ren et al., 2006                                                     |
| Shaanxi        | 0.100 | 0.400 | 0.300 | 3       | Ren et al., 2006                                                     |
| Shandong       | 0.020 | 1.860 | 0.740 | 35      | Liu et al., 2001; Xu et al., 2002; Yin et al., 2006; Wu et al., 2009 |
| Shanxi         | 0.010 | 3.350 | 0.320 | 54      | Ge, 1996                                                             |
| Sichuan        | 0.300 | 0.660 | 0.412 | 5       | Ren et al., 2006                                                     |
| Xinjiang       | 0.018 | 0.280 | 0.092 | 6       | Ren et al., 2006                                                     |
| Yunnan         | 0.015 | 3.800 | 0.380 | 42      | Zhou, 1994                                                           |
| Zhejiang       | 0.240 | 1.260 | 0.750 | 2       | Yang et al., 1983; Ren et al., 2006                                  |

Table S13

The concentration of toxic element in the selected coal, coal gangue, coal ash, clay samples and their combustion products.

|                | Ash yield (%) | Raw materials ( $\mu\text{g/g}$ ) |      |       |      | Combustion residues ( $\mu\text{g/g}$ ) |      |       |      | Flue gas ( $\mu\text{g/m}^3$ ) |      |       |      |
|----------------|---------------|-----------------------------------|------|-------|------|-----------------------------------------|------|-------|------|--------------------------------|------|-------|------|
|                |               | As                                | Cd   | Hg    | Pb   | As                                      | Cd   | Hg    | Pb   | As                             | Cd   | Hg    | Pb   |
| Coal -1        | 14.7          | 3.52                              | 0.12 | 0.262 | 14.8 | 17.4                                    | 0.50 | 0.290 | 64.8 | 6.23                           | 0.28 | 1.182 | 31.7 |
| Coal -2        | 18.4          | 5.43                              | 0.07 | 0.193 | 16.3 | 20.0                                    | 0.25 | 0.110 | 51.6 | 8.05                           | 0.16 | 1.035 | 37.6 |
| Coal -3        | 16.2          | 2.73                              | 0.08 | 0.346 | 10.5 | 12.1                                    | 0.32 | 0.180 | 43.7 | 5.34                           | 0.17 | 1.810 | 23.1 |
| Coal gangue -1 | 57.6          | 24.4                              | 0.04 | 0.317 | 23.6 | 32.1                                    | 0.04 | 0.175 | 29.3 | 37.3                           | 0.09 | 1.299 | 45.8 |
| Coal gangue -2 | 62.5          | 19.5                              | 0.06 | 0.230 | 28.8 | 23.8                                    | 0.05 | 0.096 | 33.6 | 26.4                           | 0.16 | 1.046 | 45.4 |
| Coal gangue -3 | 55.3          | 25.7                              | 0.04 | 0.174 | 24.9 | 34.0                                    | 0.04 | 0.073 | 30.9 | 38.4                           | 0.10 | 0.757 | 43.1 |
| Coal ash -1    | 96.7          | 16.9                              | 0.56 | 0.325 | 66.5 | 14.2                                    | 0.42 | 0.310 | 52.5 | 20.4                           | 0.93 | 0.108 | 86.2 |
| Coal ash -2    | 98.5          | 17.4                              | 0.68 | 0.284 | 72.3 | 13.6                                    | 0.49 | 0.269 | 59.0 | 19.3                           | 1.20 | 0.116 | 84.1 |
| Coal ash -3    | 97.3          | 15.5                              | 0.63 | 0.168 | 53.4 | 12.9                                    | 0.48 | 0.156 | 43.1 | 21.1                           | 0.97 | 0.056 | 73.0 |
| Clay -1        | 92.8          | 15.2                              | 0.04 | 0.022 | 12.5 | 14.9                                    | 0.04 | 0.011 | 12.5 | 8.39                           | 0.03 | 0.067 | 8.03 |
| Clay -2        | 94.6          | 8.39                              | 0.02 | 0.043 | 18.9 | 8.06                                    | 0.02 | 0.023 | 17.7 | 4.83                           | 0.02 | 0.136 | 14.2 |
| Clay -3        | 95.6          | 12.6                              | 0.08 | 0.076 | 16.6 | 11.9                                    | 0.07 | 0.040 | 15.2 | 6.35                           | 0.06 | 0.220 | 9.76 |

Table S14

The mass balance and distribution characterization of toxic element.

|                | Combustion residues % total |      |      |      | Flue gas % total |      |      |      | Mass balance % |      |       |      |
|----------------|-----------------------------|------|------|------|------------------|------|------|------|----------------|------|-------|------|
|                | As                          | Cd   | Hg   | Pb   | As               | Cd   | Hg   | Pb   | As             | Cd   | Hg    | Pb   |
| Coal -1        | 70.5                        | 61.5 | 24.8 | 64.3 | 29.5             | 38.5 | 75.2 | 35.7 | 78.4           | 61.5 | 109.2 | 78.6 |
| Coal -2        | 75.3                        | 62.4 | 10.6 | 61.5 | 24.7             | 37.6 | 89.4 | 38.5 | 74.2           | 54.8 | 114.8 | 68.3 |
| Coal -3        | 67.4                        | 65.6 | 12.8 | 63.4 | 32.6             | 34.4 | 87.2 | 36.6 | 69.3           | 50.7 | 112.6 | 73.9 |
| Coal gangue -1 | 74.6                        | 61.5 | 31.7 | 67.6 | 25.4             | 38.5 | 68.3 | 32.4 | 73.6           | 58.6 | 117.5 | 82.1 |
| Coal gangue -2 | 77.4                        | 54.8 | 24.2 | 73.7 | 22.6             | 45.2 | 75.8 | 26.3 | 68.7           | 48.5 | 123.6 | 79.5 |
| Coal gangue -3 | 75.1                        | 57.0 | 27.5 | 71.1 | 24.9             | 43.0 | 72.5 | 28.9 | 82.3           | 56.9 | 108.3 | 69.4 |
| Coal ash -1    | 79.8                        | 72.3 | 94.5 | 78.4 | 20.2             | 27.7 | 5.52 | 21.6 | 65.6           | 64.4 | 121.4 | 74.4 |
| Coal ash -2    | 81.5                        | 70.5 | 93.2 | 80.6 | 18.5             | 29.5 | 6.83 | 19.4 | 73.7           | 53.2 | 113.6 | 79.6 |
| Coal ash -3    | 77.3                        | 74.3 | 94.5 | 77.2 | 22.7             | 25.7 | 5.54 | 22.8 | 77.4           | 56.4 | 116.5 | 69.3 |
| Clay -1        | 90.8                        | 87.6 | 49.5 | 89.3 | 9.20             | 12.4 | 50.5 | 10.7 | 65.8           | 47.6 | 115.3 | 64.7 |
| Clay -2        | 90.4                        | 86.3 | 47.4 | 87.4 | 9.60             | 13.7 | 52.6 | 12.6 | 81.7           | 57.2 | 117.2 | 68.9 |
| Clay -3        | 91.6                        | 87.5 | 51.7 | 90.2 | 8.40             | 12.5 | 48.3 | 9.80 | 72.4           | 56.5 | 120.5 | 76.2 |



Table S15

The concentration of toxic element in flue gas at the inlet/outlet of wet flue gas desulfurization systems and removal efficiency.

|          | Inlet of desulfurization system ( $\mu\text{g}/\text{m}^3$ ) |      |      |      | Outlet of desulfurization system ( $\mu\text{g}/\text{m}^3$ ) |      |      |       | Removal efficiency (%) |      |      |      |
|----------|--------------------------------------------------------------|------|------|------|---------------------------------------------------------------|------|------|-------|------------------------|------|------|------|
|          | As                                                           | Cd   | Hg   | Pb   | As                                                            | Cd   | Hg   | Pb    | As                     | Cd   | Hg   | Pb   |
| Sample-1 | 47.6                                                         | 1.56 | 2.32 | 67.8 | 41.22                                                         | 1.41 | 2.20 | 60.61 | 13.4                   | 9.47 | 5.35 | 10.6 |
| Sample-2 | 56.4                                                         | 1.74 | 1.96 | 75.6 | 46.92                                                         | 1.54 | 1.87 | 69.23 | 16.8                   | 11.5 | 4.65 | 8.43 |
| Sample-3 | 53.9                                                         | 1.36 | 2.46 | 78.5 | 46.03                                                         | 1.25 | 2.30 | 69.16 | 14.6                   | 8.43 | 6.43 | 11.9 |

Table S16

Uncertainties in the emissions of As, Cd, Hg, and Pb by different raw materials in China in 2013 (t) at a 95% confidence interval around the central estimate.

| Raw materials | As                 | Cd                | Hg               | Pb                  |
|---------------|--------------------|-------------------|------------------|---------------------|
| Coal          | 28.66 (-6%, 18%)   | 4.03 (-9%, 23%)   | 3.80 (-16%, 27%) | 171.45 (-7%, 14%)   |
| Coal ash      | 566.02 (-53%, 46%) | 84.99 (-35, 59%)  | 1.98 (-19%, 26%) | 2891.38 (-37%, 52%) |
| Coal gangue   | 38.38 (-14%, 35%)  | 5.82 (-9%, 16%)   | 3.57 (-8%, 22%)  | 177.28 (-14%, 43%)  |
| Clay          | 10.99 (-98%, 85%)  | 0.12 (-72%, 63%)  | 0.36 (-68%, 89%) | 29.68 (-122%, 76%)  |
| Total         | 644.05 (-22%, 37%) | 94.96 (-28%, 45%) | 9.71 (-15%, 23%) | 3269.79 (-32%, 43%) |

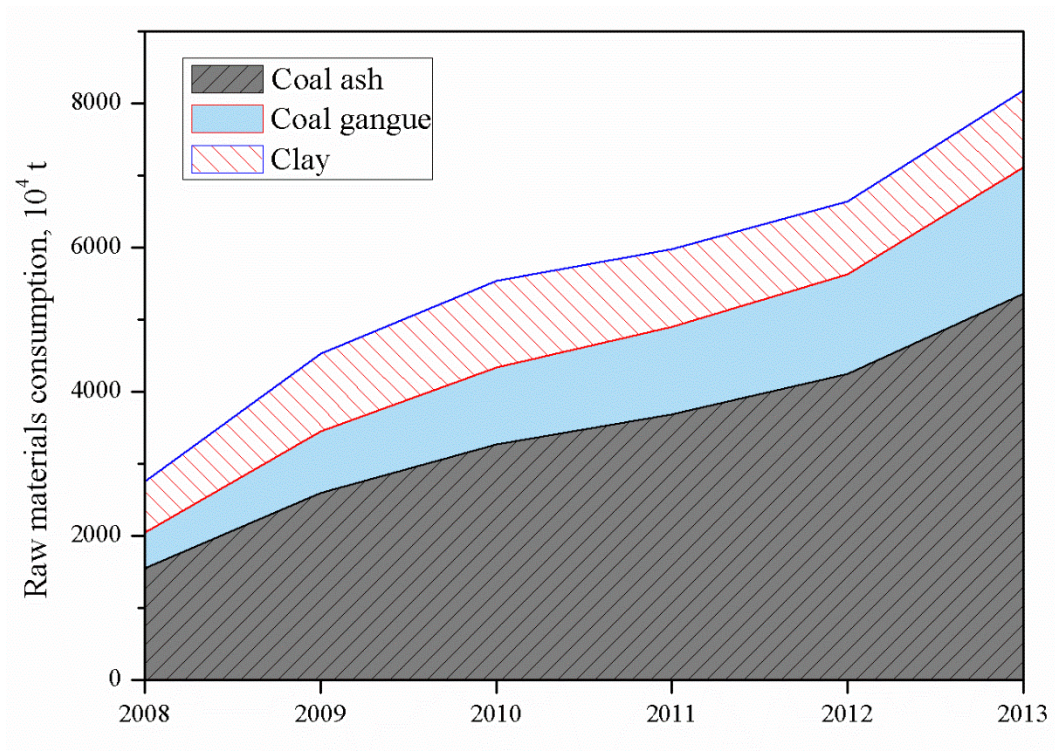

Figure S1. Trend of raw materials consumption in China, 2008-2013.

## References:

- Ao, W.H. Geochemical characteristics of hazardous elements in coal wastes from Wuda Coalfield, Inner Mongolia. Masters Dissertation, China University of Geosciences, Beijing, 2005. (In Chinese with English abstract)
- Brooks, G. Estimating air toxic emissions from coal and oil combustion sources. Radian Report to the US Environmental Protection Agency, EPA Report No. EPA-450/ 2-89-001, 1989.
- Cai, F.; Liu, Z.G.; Lin, B.Q.; Li, W.; Lv, Z. Study on trace elements in gangue in Huainan mining area. *J. China Coal Soc.* 2008, 33, 892-897. (In Chinese with English abstract)
- Chen, P.; Tang, X.Y. Arsenic in coal of China. *Coal Geol. China* 2002, 14, 18-24. (In Chinese)
- Chen, Y.C.; Li, S.Q.; Zhou, C.C. Material composition features and reclaim evaluation of coal gangue in Huainan mining area. *Coal Geol. China* 2011, 23, 20-23. (In Chinese with English abstract)
- Cui, F.H.; Chen, H.Z. Distribution and association behaviors of arsenic in coal of China. *Coal Sci. Technol.* 1998, 26, 44-46. (In Chinese)
- Cui, L.P.; Bai, J.F.; Huang, W.H.; Shi, Y.H.; Yan, S.L.; Tang, X.Y.; et al. Environmental trace elements in coal mining wastes in Huainan coalfield. *Geochimica* 2004, 33, 535-540. (In Chinese with English abstract)
- Cui, S.M.; Li, W.Q.; Wang, C.F. Composition determination comprehensive utilization for Henan coal gangues. *Chem. Res.* 2004, 15, 45-48. (In Chinese with English abstract)
- Dai, S.F. Geological-geochemical behaviors and enrichment models of associated elements in coal. Doctoral Dissertation, China University of Mining & Technology, Beijing, 2002. (In Chinese with English abstract)
- Ding, W.; Huang, Z.L.; Zhou, J.X.; Gu, J. Evaluation on comprehensive utilization of trace elements from coal gangue in Shuicheng, Guizhou. *Acta Mineral. Sinica* 2011, 31, 502-508. (In Chinese with English abstract)
- Goodarzi, F. Assessment of elemental content of milled coal, combustion residues, and stack emitted materials: possible environmental effects for a Canadian pulverized coal-fired power coal. *Int. J. Coal Geol.* 2006, 65, 17-25.
- Guo, X.; Zheng, C.G.; Xu, M.H. Characterization of mercury emissions from a coal-fired power plant. *Energy Fuel* 2007, 21, 898-902.

- Helble, J.J. A model for the air emission of trace metallic elements from coal combustors equipped with electrostatic precipitators. *Fuel Process. Technol.* 2000, 63, 125-147.
- Huang, W.H.; Yang, Y.C. Mercury in coal of China. *Coal Geol. China* 2002, 14, 37-40. (In Chinese with English abstract)
- Ito, S.; Yokoyama, T.; Asakura, K. Emissions of mercury and other trace elements from coal-fired power plants in Japan. *Sci. Total Environ.* 2006, 368, 397-402.
- Jin, X.Z.; Wang, G.X.; Liu, S.Q.; Jiang, S.Y.; Xu, H.L. Investigation on the utilization of coal gangue from Jiaozuo coal mine area. *China Non-metal. Mineral. Indus.* 2012, 5, 13-18. (In Chinese with English abstract)
- Lee, S.J.; Seo, Y.C.; Jiang, H.N.; Park, K.S.; Baek, J.I.; An, H.S.; Song, K.C. Speciation and mass distribution of mercury in a bituminous coal-fired power plant. *Atmos. Environ.* 2006, 40, 2215-2224.
- Li, W.H.; Xiong, F.; Jiang, N. Trace elements in three high sulfide coals. *Coal Anal. Util.* 1993, 1, 7-9. (In Chinese)
- Lu, X.H.; Ali, A.; Liu, H.Z.; Zeng, H.C. Multi-variable analysis and experimental researches on the distribution of trace elements in coal. *Environ. Chem.* 1995, 14, 494-499. (In Chinese)
- Li, X.Y. Coal gangue hill impact in the environment in the Gequan gangue district of Xintai. Masters Dissertation, Hebei University of Engineering, Hebei, 2010. (In Chinese with English abstract)
- Liu, G.J.; Yang, P.Y.; Peng, Z.C.; Wu, E.J.; Wang, G.L. Study on leaching of potentially hazardous trace elements from coal-waste rocks. *Geol. J. China Univers.* 2001, 7, 449-457. (In Chinese with English abstract)
- Meij, R.; Te Winkel, H. The emissions of heavy metals and persistent organic pollutants from modern coal-fired power stations. *Atmos. Environ.* 2007, 41, 9262-9272.
- Ondov, J.M.; Ragaini, R.C.; Biermann, A.H. Emissions and particle-size distributions of minor and trace elements at two western coal-fired power plants equipped with cold-side electrostatic precipitators. *Environ. Sci. Technol.* 1979, 13, 946-953.
- Otero-Rey, J.R.; Lopez-Vilarino, J.M.; Moreda-Pineiro, J.; Alonso-Rodriguez, E.; Muniategui-Lorenzo, S.; et al., As, Hg, and Se flue gas sampling in a coal-fired power plant and their fate during coal combustion. *Environ. Sci. Technol.* 2003, 37, 5262-5267.

- Ouyang, S.L.; Wang, J.X.; Ling, P. Environmental evaluation of the soil around mine rock dump in Jiulong coal mine. *Energy Environ. Protect.* 2013, 27, 54-56. (In Chinese with English abstract)
- Pavlish, J.H.; Sondreal, E.A.; Mann, M.D.; Olson, E.S.; Galbreath, K.C.; Laudal, D.L.; Benson, S.A. Status review of mercury control options for coal-fired power plants. *Fuel Process. Technol.* 2003, 82, 89-165.
- Reddy, M.S.; Baha, S.; Joshi, H.V.; Jha, B. Evaluation of the emission characteristics of trace metals from coal and fuel oil fired power plants and their fate during combustion. *J. Hazard. Mater.* 2005, B123, 242-249.
- Ren, D.Y.; Zhao, F.H.; Dai, S.F.; Zhang, J.Y.; Luo, K.L. *Geochemistry of trace elements in coal.* Beijing, Science Press, 2006. (In Chinese)
- Song, D.Y. Burning-leaching migration behavior of harmful trace elements in coal and its environmental effect. Doctoral Dissertation, China University of Mining & Technology, Jiangsu, 2003. (In Chinese with English abstract)
- Song, W.; He, T.R. Environmental effects of mercury on coal mine spoils in Panxian of Guizhou Province. *Chinese J. Ecol.* 2009, 28, 1589-1593. (In Chinese with English abstract)
- Song, Z.G. The property and the comprehensive utilization of coal gangue in Qitaihe mining area. Masters Dissertation, Liaoning Technology University, Liaoning, 2007. (In Chinese with English abstract)
- Streets, D.G.; Hao, J.M.; Wu, Y.; Jiang, J.K.; Chan, M.; et al. Anthropogenic mercury emissions in China. *Atmos. Environ.* 2005, 39, 7789-7806.
- Sun, X.H.; Yi, Q.Z.; Liu, H.H.; Ding, Y. Study on leaching characteristics of heavy metals in coal gangue. *Jiangsu Environ. Sci. Technol.* 2007, 20, 20-25. (In Chinese with English abstract)
- Szpunar, C.B. Projections of air toxic emissions from coal-fired utility combustion: input for hazardous air pollutant regulators. Proceedings of the 2<sup>nd</sup> EPRI International Conference on Managing Hazardous Air Pollutants, Washington DC, July, 1993.
- Tang, X.Y.; Zhao, X.Y. Mode of occurrence of trace element in coal. *Coal Geol. China* 2002, 14, 14-17. (In English)
- Tian, H.Z.; Liu, K.Y.; Zhou, J.R.; Lu, L.; Hao, J.M.; Qiu, P.P.; et al. Atmospheric emission inventory of hazardous trace elements from China's coal-fired power plants-Temporal trends

- and spatial variation characteristics. *Environ. Sci. Technol.* 2014, 48, 3575-3582.
- USEPA (U.S. Environmental Protection Agency). Research and development: Characterization and management of residues from coal-fired power plants. EPA-600/R-02-083, U.S. Environmental Protection Agency: Washington, DC.2002.
- Wang, Q.C.; Ma, R.L. The mercury in coal and its cinder. *China Environ. Sci.* 1997, 17, 76-79. (In Chinese with English abstract)
- Wang, Q.C.; Kang, S.L.; Chen, C.; Wang, Z.G.; Zou, S.T. Study on the contents and distribution laws of trace elements in coal in northeast China and eastern Inner Mongolia. *Environ. Chem.* 1996, 15, 27-35. (In Chinese with English abstract)
- Wang, Q.C.; Shen, W.G.; Ma, Z.W. Estimation of mercury emission from coal combustion in China. *Environ. Sci. Technol.* 2000, 34, 2711-2713.
- Wang, S.X.; Zhang, L.; Li, G.H.; Wu, Y.; Hao, J.M.; et al. Mercury emission and speciation of coal-fired power plants in China. *Atmos. Chem. Phys.* 2010, 10, 1183-1192.
- Wang, Y.Q. Distribution and association behaviors of trace elements in coal and combustion products. Doctoral Dissertation, China University of Mining & Technology, Beijing, 1994. (In Chinese with English abstract)
- Wang, Y.; Ren, D.Y.; Xie, H. The distribution and migration of trace elements in coal combustion. *Coal Mine Environ. Protect.* 1995, 9, 25-28. (In Chinese)
- Wu, X.R.; Hao, Q.Y.; F, S.Y. Discussion on hazardous trace elements precipitation process in coal gangue. *Coal Geol. Explor.* 2009, 37, 43-46. (In Chinese with English abstract)
- Wu, Z.Y.; Li, Y.H.; Zhou, Y.C. Microelements geochemical characteristics of coals in different sedimentary environments of southern Jilin Province. *Acta Petrol. Et Mineral.* 2004, 23, 361-364. (In Chinese with English abstract)
- Xu, L.; Zhang, H.; Sang, S.X. Geochemistry behavior of trace elements in bastard coal. *Coal Geol. Explor.* 2002, 30, 1-3. (In Chinese with English abstract)
- Yang, S.J.; Qian, Q.F.; Jiang, Z.; Wang, C.; Yuan, J.W. Distribution characterization of elements in combustion residues in coal-fired plant. *Environ. Chem.* 1983, 2, 32-35. (In Chinese)
- Yao, D.C.; Zhi, X.C.; Zheng, B.S. The transformation and concentrations of 5 trace elements during coal combustion. *Environ. Chem.* 2004, 23, 31-37. (In Chinese with English abstract)
- Yin, E.Q.; Hao, Q.Y.; Wang, H. Research and recognition trace element of effect environmental in

- the gangue of Yanjiteng mining area in Shandong. *China Mining Magaz.* 2006, 15, 67-70. (In Chinese with English abstract)
- Yokoyama, T.; Asakura, K.; Matsuda, H.; Ito, S.; Noda, N. Mercury emissions from a coal-fired power plant in Japan. *Sci. Total Environ.* 2000, 259, 97-103.
- Yuan, S.W. Coal quality in China. *China Coal Indus. Publ. House*, Beijing, 1999, pp, 92-138. (In Chinese)
- Yue, M.; Zhao, F.H.; Sun, H.F.; Ren, D.Y. The kinetics of oxidation reaction of pyrites from coal-bearing measure. *J. China Coal Geol.* 2005, 30, 75-79. (In Chinese with English abstract)
- Zhang, H. Study on the characteristics of elements and PAHs of coal gangue of Duerping coal deposit. Masters Dissertation, Taiyuan University of Technology, Shanxi, 2012. (In Chinese with English abstract)
- Zhang, J.Y. Comparison the mainly hazardous elements between two coal gangue from Panxian of Guizhou Province and their effects to utilization. Masters Dissertation, Guizhou University, Guizhou, 2009. (In Chinese with English abstract)
- Zhang, L.; Zhuo, Y.Q.; Chen, L.; Xu, X.C.; Chen, C.H. Mercury emissions from six coal-fired power plants in China. *Fuel Process. Technol.* 2008, 89, 1033-1040.
- Zhang, Z.F.; Fan, J.C.; Yang, Y.C.; Song, L.J.; Yang, H. Mode of occurrence of Pb, As, Be, Cr in coal. *J. Fuel Chem. Technol.* 1992, 20, 206-212. (In Chinese with English abstract)
- Zhao, H.Z. Study on geochemical characteristics of coal gangue and its utilization in the southern part of Liaoning and Jilin Province. Masters Dissertation, Jilin University, Jilin, 2007. (In Chinese with English abstract)
- Zhou, C.C.; Liu, G.J.; Wu, D.; Fang, T.; Wang, R.W.; Fan, X. Mobility behavior and environmental implications of trace elements associated with coal gangue: A case study at the Huainan Coalfield in China. *Chemosphere* 2014a, 95, 193-199.
- Zhou, C.C.; Liu, G.J.; Fang, T.; Sun, R.Y.; Wu, D. Leaching characteristic and environmental implication of rejection rocks from Huainan Coalfield, Anhui Province, China. *J. Geochem. Explor.* 2014b, 143, 54-61.
- Zhou, J.X.; Zhang, L.; Luo, Z.Y.; Hu, C.X.; He, S.; et al. Study on mercury emission and its control for boiler of 200 MW unit. *Thermal Power Generat.* 2008, 37, 22-27. (In Chinese with an English abstract)



- Zhou, X.D. Distribution characteristics of arsenic in coal of Ganzhong mining area. *Coal Geol. China* 1991, 3, 39-44. (In Chinese with English abstract)
- Zhou, Y.P. Distribution type and occurrence form of arsenic in anthracite of Laochang mining area. *Coal Geol. Explor.* 1998, 26, 8-13. (In Chinese with English abstract)
- Zhu, Z. J.; Xue, L.; Tan, Y.; Zhang, C.L.; Li, Y.G.; Zhang, D.L.; et al. Research on characteristics of mercury distribution in combustion products for 300MW pulverized coal-fired boiler. *Power Engin.* 2002, 22, 1594-1597. (In Chinese with English abstract)
- Zhuang, X.G.; Yang, S.K.; Zeng, R.S.; Xu, W.D. Characteristics of trace elements in coals from several main coal districts in China. *Geol. Sci. Technol. Inform.* 1999, 18, 63-65. (In Chinese with English abstract)
- Zhuang, X.G.; Gong, J.Q.; Zeng, R.S.; Kong, H.L. Contrast research on trace elements of Late Permian and Late Triassic coals in Northeastern Jiangxi Province. *Coal Geol. China* 2001, 13, 15-17. (In Chinese with English abstract)
